# Supplementary material for: Uncovering Prognosis-Related Genes and Pathways by Multi-Omics Analysis in Lung Cancer
Source: PubMed Central journal article supplement (PMC7225957; doi:10.3390/biom10040524), 2020-03-30
Supplement: biomolecules-10-00524-s001.pdf [file biomolecules-10-00524-s001.pdf]

**Supplementary Table S1.** Survival associated 33 features selected by log-rank test.

| <b>Number</b> | <b>Feature</b> | <b>Likelihood ratio test</b> | <b>Wald test</b> | <b>Log-rank test</b> |
|---------------|----------------|------------------------------|------------------|----------------------|
| 1             | Feature 1      | $p = 0.009$                  | $p = 0.009$      | $p = 0.009$          |
| 2             | Feature 4      | $p = 0.02$                   | $p = 0.02$       | $p = 0.02$           |
| 3             | Feature 6      | $p = 0.01$                   | $p = 0.01$       | $p = 0.01$           |
| 4             | Feature 7      | $p = 0.04$                   | $p = 0.04$       | $p = 0.04$           |
| 5             | Feature 15     | $p = 0.008$                  | $p = 0.007$      | $p = 0.007$          |
| 6             | Feature 21     | $p = 0.05$                   | $p = 0.05$       | $p = 0.05$           |
| 7             | Feature 23     | $p = 0.03$                   | $p = 0.03$       | $p = 0.03$           |
| 8             | Feature 27     | $p = 0.02$                   | $p = 0.02$       | $p = 0.02$           |
| 9             | Feature 28     | $p = 0.02$                   | $p = 0.02$       | $p = 0.02$           |
| 10            | Feature 33     | $p = 0.009$                  | $p = 0.009$      | $p = 0.009$          |
| 11            | Feature 36     | $p = 0.009$                  | $p = 0.008$      | $p = 0.008$          |
| 12            | Feature 37     | $p = 0.009$                  | $p = 0.01$       | $p = 0.01$           |
| 13            | Feature 38     | $p = 1e-04$                  | $p = 1e-04$      | $p = 1e-04$          |
| 14            | Feature 44     | $p = 0.01$                   | $p = 0.01$       | $p = 0.01$           |
| 15            | Feature 46     | $p = 0.01$                   | $p = 0.01$       | $p = 0.01$           |
| 16            | Feature 48     | $p = 0.02$                   | $p = 0.02$       | $p = 0.02$           |
| 17            | Feature 51     | $p = 0.02$                   | $p = 0.02$       | $p = 0.02$           |
| 18            | Feature 58     | $p = 0.005$                  | $p = 0.005$      | $p = 0.005$          |
| 19            | Feature 59     | $p = 0.005$                  | $p = 0.005$      | $p = 0.005$          |
| 20            | Feature 61     | $p = 0.02$                   | $p = 0.02$       | $p = 0.02$           |
| 21            | Feature 62     | $p = 0.007$                  | $p = 0.007$      | $p = 0.007$          |
| 22            | Feature 65     | $p = 0.007$                  | $p = 0.007$      | $p = 0.007$          |
| 23            | Feature 67     | $p = 0.05$                   | $p = 0.05$       | $p = 0.05$           |
| 24            | Feature 71     | $p = 0.003$                  | $p = 0.003$      | $p = 0.003$          |
| 25            | Feature 72     | $p = 0.008$                  | $p = 0.007$      | $p = 0.007$          |
| 26            | Feature 73     | $p = 0.05$                   | $p = 0.05$       | $p = 0.05$           |
| 27            | Feature 74     | $p = 0.01$                   | $p = 0.01$       | $p = 0.01$           |
| 28            | Feature 79     | $p = 3e-04$                  | $p = 3e-04$      | $p = 3e-04$          |
| 29            | Feature 82     | $p = 0.04$                   | $p = 0.04$       | $p = 0.04$           |
| 30            | Feature 84     | $p = 4e-05$                  | $p = 5e-05$      | $p = 5e-05$          |
| 31            | Feature 87     | $p = 0.04$                   | $p = 0.04$       | $p = 0.04$           |
| 32            | Feature 92     | $p = 0.005$                  | $p = 0.005$      | $p = 0.005$          |
| 33            | Feature 100    | $p = 0.04$                   | $p = 0.04$       | $p = 0.04$           |

**Supplementary Table S2.** ANOVA ranked miRNA and genes (top 20 and 30, respectively) used for SVM.

| <b>Number</b> | <b>miRNA</b> | <b>Gene</b>     |
|---------------|--------------|-----------------|
| 1             | miR-21       | <i>SFTPB</i>    |
| 2             | miR-375      | <i>ADAM6</i>    |
| 3             | miR-143      | <i>H19</i>      |
| 4             | miR-10a      | <i>LYZ</i>      |
| 5             | miR-99b      | <i>FTL</i>      |
| 6             | miR-10b      | <i>FN1</i>      |
| 7             | miR-148a     | <i>MUC5B</i>    |
| 8             | miR-22       | <i>SFTPA2</i>   |
| 9             | Let-7b       | <i>S100A9</i>   |
| 10            | miR-30a      | <i>CD74</i>     |
| 11            | miR-182      | <i>CPM</i>      |
| 12            | miR-183      | <i>LOC96610</i> |
| 13            | miR-92a-2    | <i>IGF2</i>     |
| 14            | miR-203a     | <i>ACTB</i>     |
| 15            | miR-29a      | <i>GAPDH</i>    |
| 16            | miR-200c     | <i>TMSB4XP8</i> |
| 17            | Let-7a-2     | <i>ALDH1A1</i>  |
| 18            | miR-100      | <i>SLC34A2</i>  |
| 19            | miR-103a-1   | <i>ERBB2</i>    |
| 20            | miR-30d      | <i>FTH1</i>     |
| 21            | NA           | <i>KRT18</i>    |
| 22            | NA           | <i>TPT1</i>     |
| 23            | NA           | <i>COL3A1</i>   |
| 24            | NA           | <i>COL1A1</i>   |
| 25            | NA           | <i>ACTG1</i>    |
| 26            | NA           | <i>KRT8</i>     |
| 27            | NA           | <i>EEF1A1</i>   |
| 28            | NA           | <i>B2M</i>      |
| 29            | NA           | <i>RPL3</i>     |
| 30            | NA           | <i>ENO1</i>     |

**Supplementary Computer Code.** Keras code we implemented an autoencoder algorithm.

```
inp = Input(shape=(13767,))

encoded = Dense(500, activation='tanh',
               kernel_regularizer=regularizers.l2(10e-3),
               activity_regularizer=regularizers.l1(10e-4))(inp)

encoded = Dropout(0.5)(encoded)
encoded = Dense(100, activation='tanh',
               kernel_regularizer=regularizers.l2(10e-3),
               activity_regularizer=regularizers.l1(10e-4))(encoded)

encoded = Dropout(0.5)(encoded)
decoded = Dense(500, activation='tanh')(encoded)
decoded = Dense(13767, activation='tanh')(decoded)

autoencoder = Model(inp, decoded)
sgd = optimizers.SGD(lr=0.01, decay=1e-6, momentum=0.9, nesterov=True)
autoencoder.compile(optimizer='sgd',
                   loss='mean_squared_error',
                   metrics=['accuracy'])

history = autoencoder.fit(X, X,
                        epochs=150,
                        batch_size=1)
```
